# Supplementary material for: Nicotine aversion is mediated by GABAergic interpeduncular nucleus inputs to laterodorsal tegmentum
Source: PubMed Central journal article supplement (PMC6045623; doi:10.1038/s41467-018-04654-2), 2018-07-13
Supplement: 41467_2018_4654_MOESM1_ESM.pdf [file 41467_2018_4654_MOESM1_ESM.pdf]

## **Supplementary Figures**

# **Nicotine aversion is mediated by GABAergic interpeduncular nucleus inputs to laterodorsal tegmentum**

Shannon L. Wolfman, Daniel F. Gill, Feli Bogdanic, Katie Long, Ream Al-Hasani, Jordan G. McCall, Michael R. Bruchas, and Daniel S. McGehee

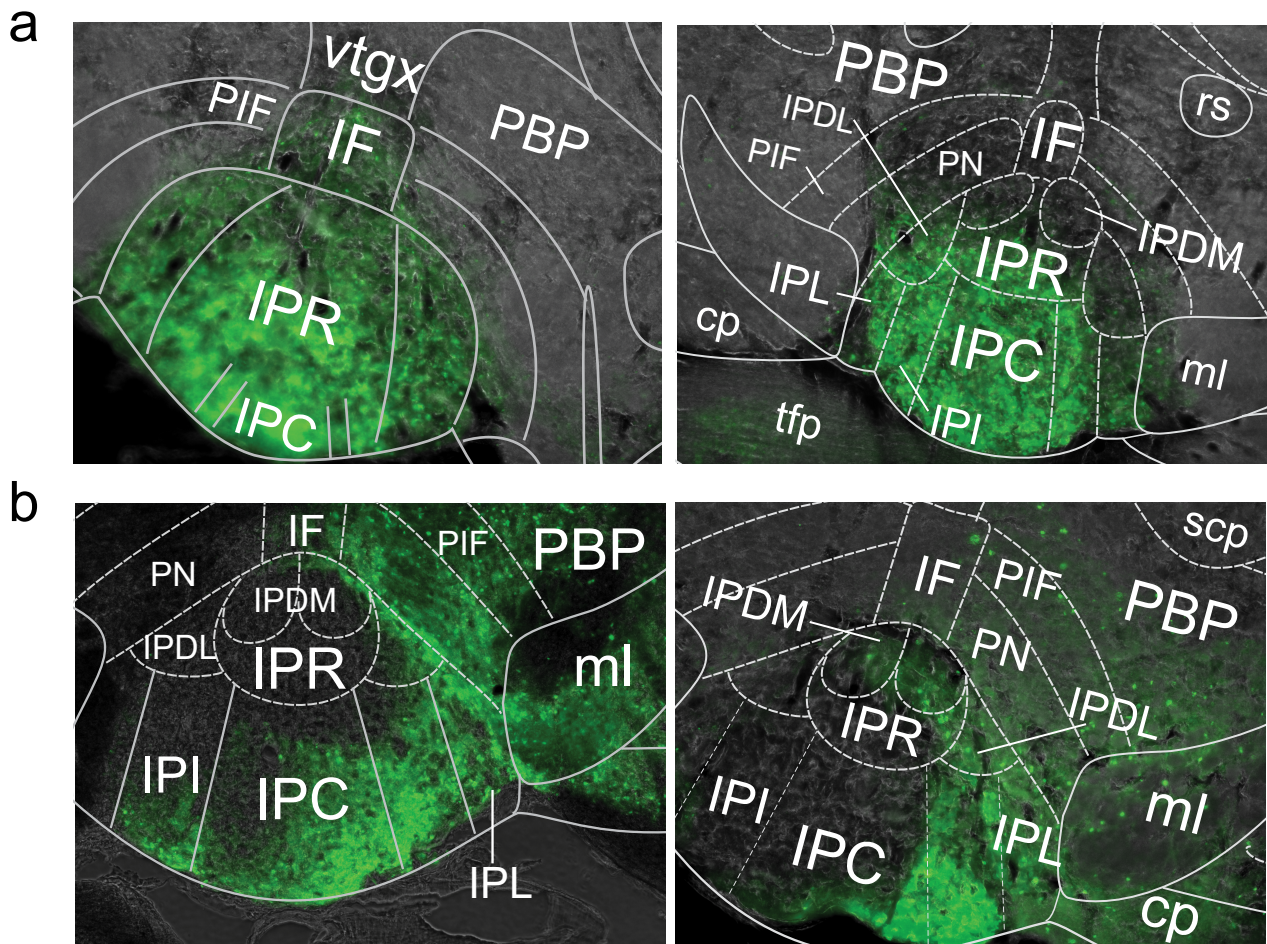

**Supplementary Figure 1. Exclusion criteria for IPN viral expression.** (a) Examples of good expression in the IPN without expression in the VTA. These animals' data were included in analyses. (b) Examples of ChR2 expressed substantially in the VTA. These animals' data were excluded from analyses.

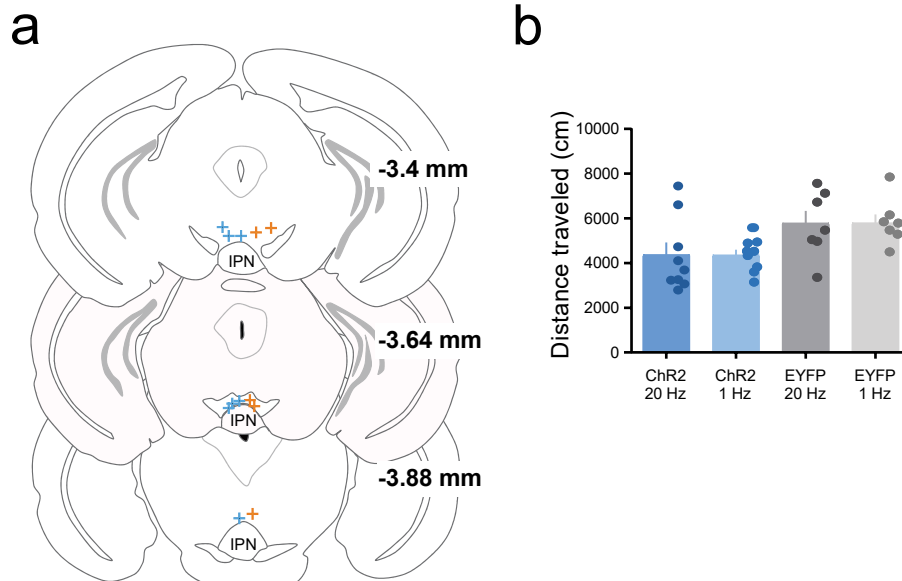

**Supplementary Figure 2. Fiber placement and distance traveled during 473 nm light delivery to IPN.** (a) Fiber optic placements above the IPN (blue-ChR2, orange-EYFP). (b) Distance traveled for all groups; one-way ANOVA,  $F_{3, 28}=3.234$ ,  $P=0.0372$ , Holm-Sidak post-hoc test  $P>0.1$  for all individual comparisons. Data are presented as mean  $\pm$  SEM.

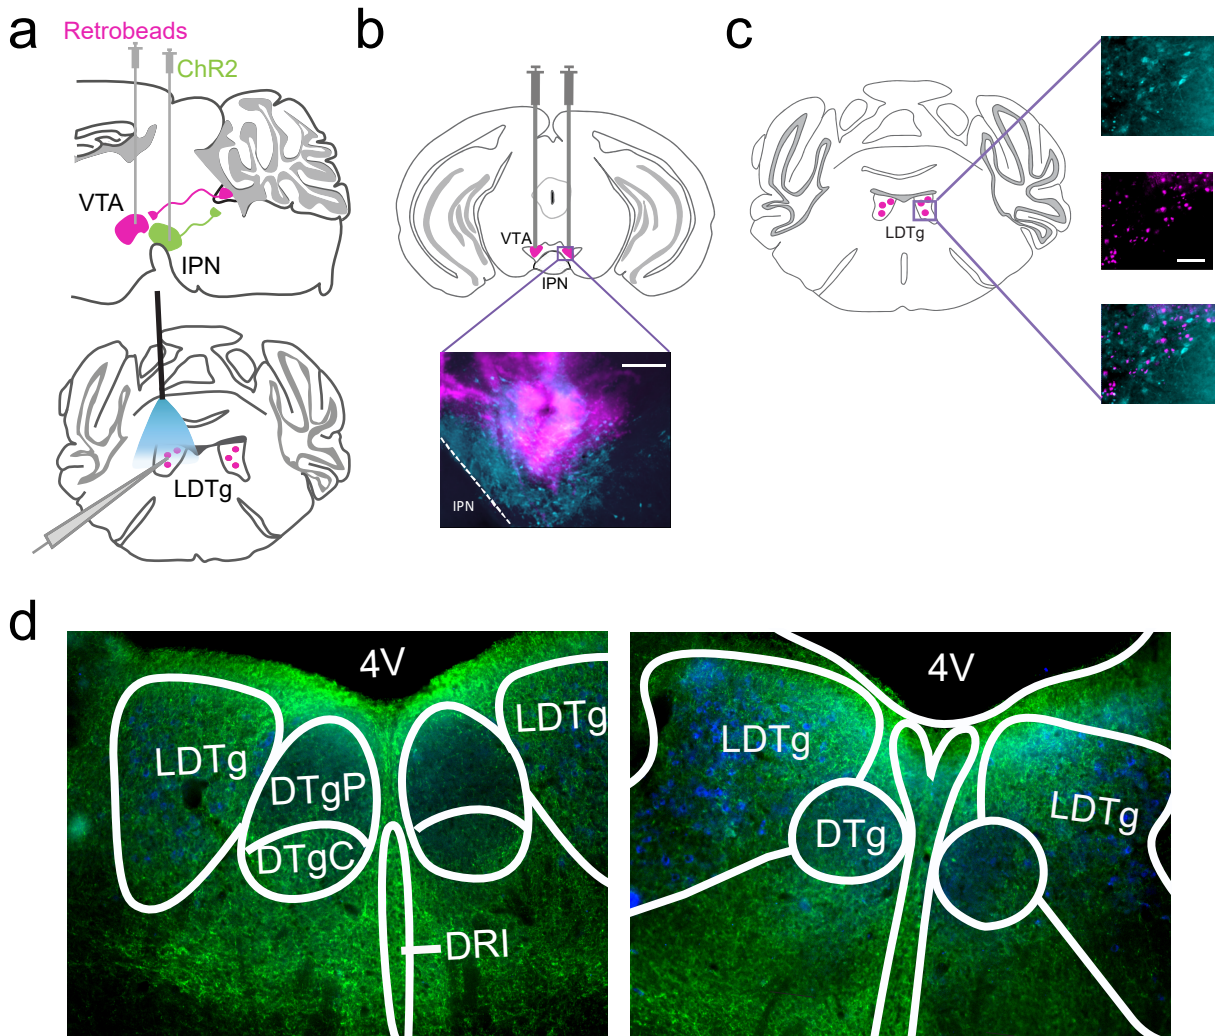

**Supplementary Figure 3. Representative images of key experimental components.** (a) Upper: schematic of surgeries, including retrobead injection into VTA and ChR2 expression in IPN. Lower: recording schematic in which VTA-projecting LDTg neurons are recorded from in slices and blue light is delivered to IPN terminals. (b) Upper: schematic of VTA dye injections. Lower: fluorescent image of VTA with retrobeads infused (green-TH, blue-dye). Scale = 200  $\mu$ m (c) Left: cartoon demonstrating back-labeled LDTg neurons. Right: fluorescent image of back-labeled LDTg neurons (red) amongst ChAT-positive cells (green) that are characteristic of the LDTg. Scale = 50  $\mu$ m (d) Representative images of EYFP-labeled axons from the IPN in the LDTg (green) amongst ChAT-positive cells (blue) that are characteristic of the LDTg.

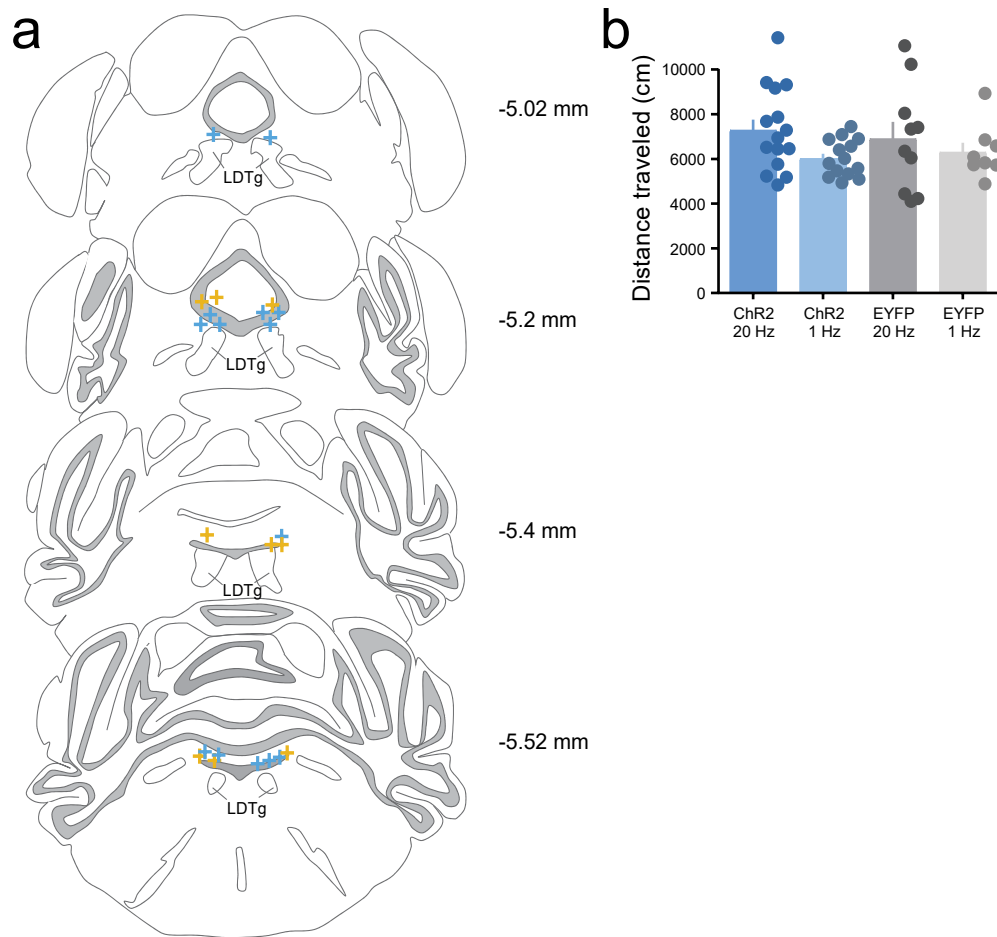

**Supplementary Figure 4. Fiber placement and locomotion during 473 nm light delivery to IPN terminals in the LDTg. (a)** Fiber optic placements above the LDTg (blue-ChR2, orange-EYFP). **(b)** Distance traveled for all groups that received blue light delivery to the LDTg; one-way ANOVA,  $F_{3, 43}=1.544$ ,  $P=0.2169$ ,  $n=15$   $n=14$   $n=10$   $n=8$  mice. Data are presented as mean  $\pm$  SEM.

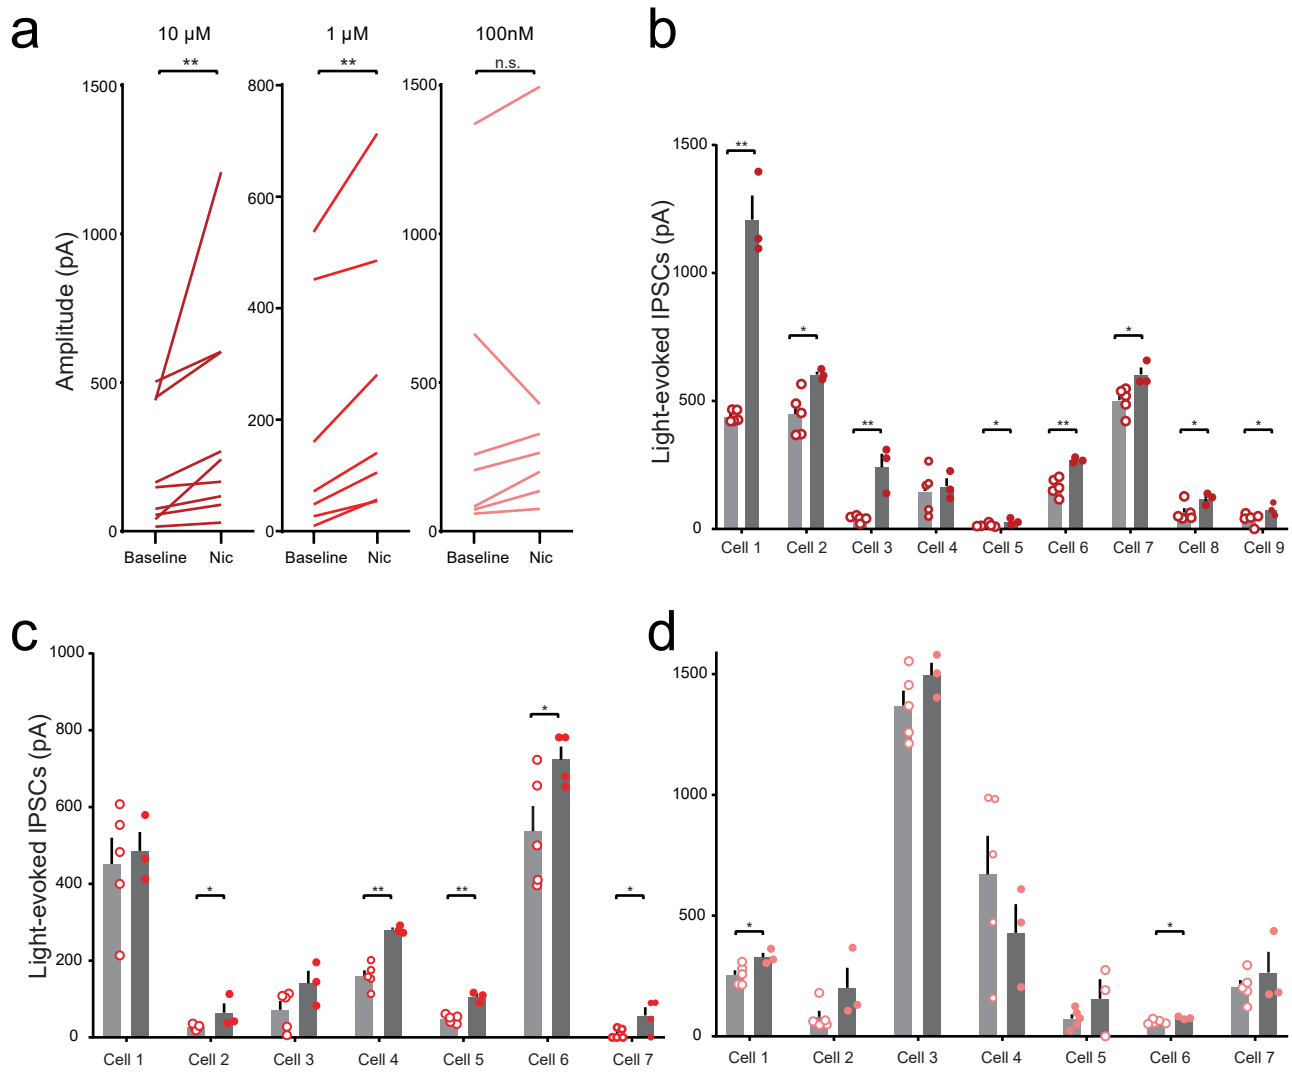

**Supplementary Figure 5. Optically evoked IPSC (oIPSC) raw data and within cell comparisons.** (a) Change in average oIPSC amplitudes recorded from individual LDTg neurons backlabeled from VTA, baseline vs nicotine; ratio paired t-tests (one-tailed): 10 $\mu$ M nicotine,  $t_8=3.492$ ,  $P=0.0041$ ,  $n=9$ ; 1 $\mu$ M nicotine,  $t_6=3.367$ ,  $P=0.0075$ ,  $n=7$ ; 100nM nicotine,  $t_6=1.708$ ,  $P=0.0692$ ,  $n=7$  cells. (b) Individual oIPSC amplitudes (symbols) and average oIPSC amplitudes (bars,  $\pm$  SEM), baseline vs 10 $\mu$ M nicotine; unpaired t-tests (one-tailed):  $t_6=10.93$ ,  $P<0.0001$ ;  $t_6=3.022$ ,  $P=0.0117$ ;  $t_6=5.197$ ,  $P=0.0010$ ;  $t_6=0.3387$ ,  $P=0.3732$ ;  $t_6=2.095$ ,  $P=0.0405$ ;  $t_6=4.948$ ,  $P=0.0013$ ;  $t_6=2.769$ ,  $P=0.0162$ ;  $t_6=2.271$ ,  $P=0.0318$ ;  $t_6=2.156$ ,  $P=0.0372$ . (c) Individual oIPSC amplitudes (symbols) and average oIPSC amplitudes (bars,  $\pm$  SEM), baseline vs 1 $\mu$ M nicotine; unpaired t-tests (one-tailed):  $t_6=0.3489$ ,  $P=0.3695$ ;  $t_6=2.047$ ,  $P=0.0433$ ;  $t_6=1.788$ ,  $P=0.0620$ ;  $t_6=6.139$ ,  $P=0.0004$ ;  $t_6=6.66$ ,  $P=0.0003$ ;  $t_7=2.33$ ,  $P=0.0263$ ;  $t_7=2.382$ ,  $P=0.0244$ . (d) Individual oIPSC amplitudes (symbols) and average oIPSC amplitudes (bars,  $\pm$  SEM), baseline vs 100nM nicotine; unpaired t-tests (one-tailed):  $t_6=2.629$ ,  $P=0.0196$ ;  $t_6=1.735$ ,  $P=0.0667$ ;  $t_6=1.379$ ,  $P=0.1086$ ;  $t_6=1.059$ ,  $P=0.1651$ ;  $t_6=1.281$ ,  $P=0.1237$ ;  $t_6=2.763$ ,  $P=0.0164$ ;  $t_6=0.8056$ ,  $P=0.2256$ . \*\* $P<0.01$ , \* $P<0.05$ .

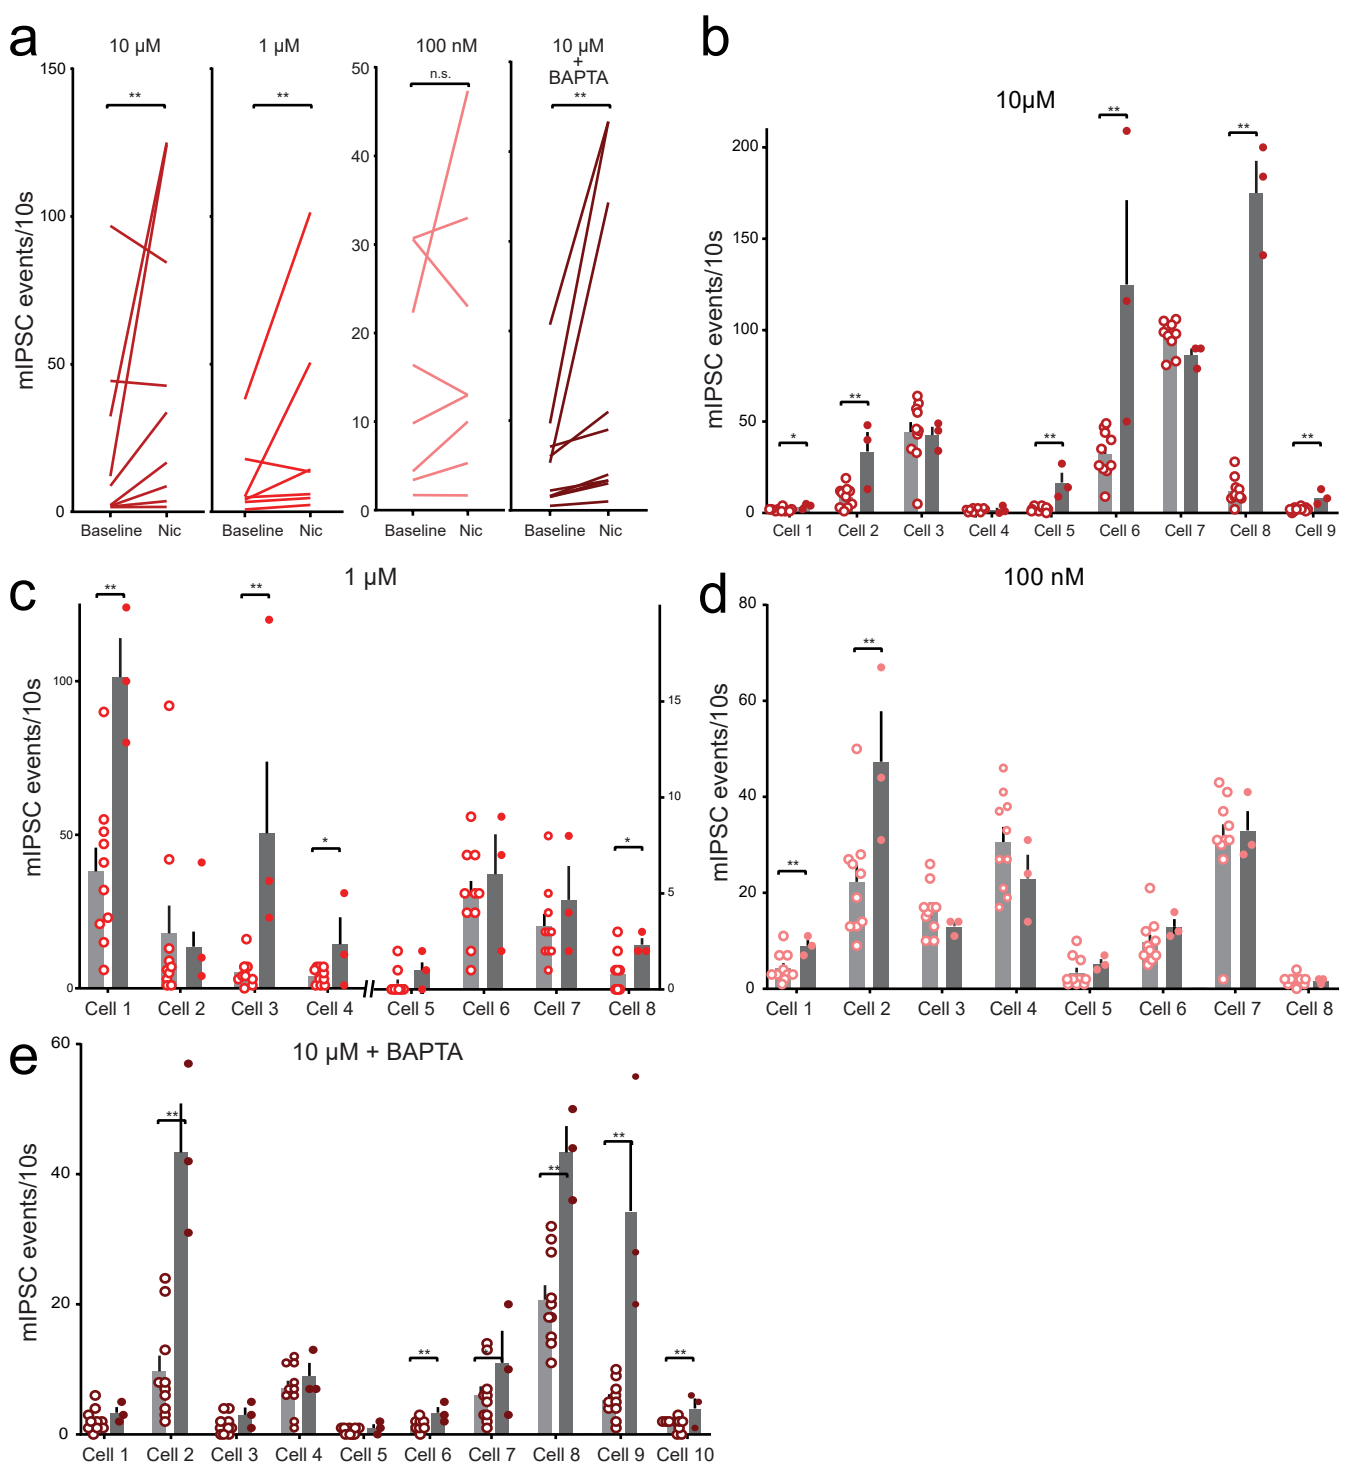

**Supplementary Figure 6. mIPSC frequency raw data and within cell comparisons.** (a) Change in mIPSC frequencies, baseline vs nicotine, for individual LDTg neurons backlabeled from VTA; ratio paired t-tests (one-tailed): 10 $\mu$ M nicotine,  $t_8=3.33$ ,  $P=0.0052$ ,  $n=9$ ;  $t_7=3.176$ ,  $P=0.0078$ ,  $n=8$ ;  $t_7=1.546$ ,  $P=0.083$ ;  $t_9=5.479$ ,  $P=0.0002$ ,  $n=10$  cells. (b) Individual mIPSC frequencies (symbols) and within cell averages (bars, +/- SEM), baseline (light bars) vs 10 $\mu$ M nicotine (dark bars); unpaired t-tests (one-tailed):  $t_{11}=2.685$ ,  $P=0.0106$ ;  $t_{11}=4.039$ ,  $P=0.0010$ ;  $t_{11}=0.1557$ ,  $P=0.44$ ;  $t_{13}=0$ ,  $P=0.5$ ;  $t_{11}=5.268$ ,  $P=0.0001$ ;  $t_{12}=3.187$ ,  $P=0.0039$ ;  $t_{13}=2.732$ ,  $P=0.086$ ;  $t_{13}=10.89$ ,  $P<0.0001$ ;  $t_{11}=5.026$ ,  $P=0.0004$ . (c) Individual mIPSC frequencies, baseline vs 1 $\mu$ M nicotine; unpaired t-tests (one-tailed):  $t_{11}=4.006$ ,  $P=0.0010$ ;  $t_{11}=1.428$ ,  $P=0.0905$ ;  $t_{11}=3.633$ ,  $P=0.0020$ ;  $t_{11}=2.245$ ,  $P=0.0232$ ;  $t_{11}=0.632$ ,  $P=0.2702$ ;  $t_{11}=0.9304$ ,  $P=0.1861$ ;  $t_{11}=0.231$ ,  $P=0.4108$ ;  $t_{11}=2.411$ ,  $P=0.0173$ . (d) Individual raw mIPSC frequencies, baseline vs 100nM nicotine; unpaired t-tests (one-tailed):  $t_{12}=3.178$ ,  $P=0.0040$ ;  $t_{11}=2.869$ ,  $P=0.0076$ ;  $t_{12}=1.193$ ,  $P=0.1280$ ;  $t_{12}=1.197$ ,  $P=0.1272$ ;  $t_{12}=1.535$ ,  $P=0.0754$ ;  $t_{11}=1.108$ ,  $P=0.1457$ ;  $t_{11}=0.3285$ ,  $P=0.3743$ ;  $t_{11}=0.05118$ ,  $P=0.4800$ . (e) Individual raw mIPSC frequencies, BAPTA+baseline vs BAPTA+10 $\mu$ M nicotine; unpaired t-tests (one-tailed):  $t_{11}=1.005$ ,  $P=0.1682$ ;  $t_{11}=5.743$ ,  $P<0.0001$ ;  $t_{11}=1.416$ ,  $P=0.0923$ ;  $t_{11}=0.7953$ ,  $P=0.2216$ ;  $t_{11}=1.188$ ,  $P=0.1300$ ;  $t_{11}=2.764$ ,  $P=0.0092$ ;  $t_{19}=1.743$ ,  $P=0.0487$ ;  $t_{13}=5.127$ ,  $P<0.0001$ ;  $t_{12}=5.671$ ,  $P<0.0001$ ;  $t_{14}=3.424$ ,  $P=0.0021$ . \*\* $P<0.01$ , \* $P<0.05$ .

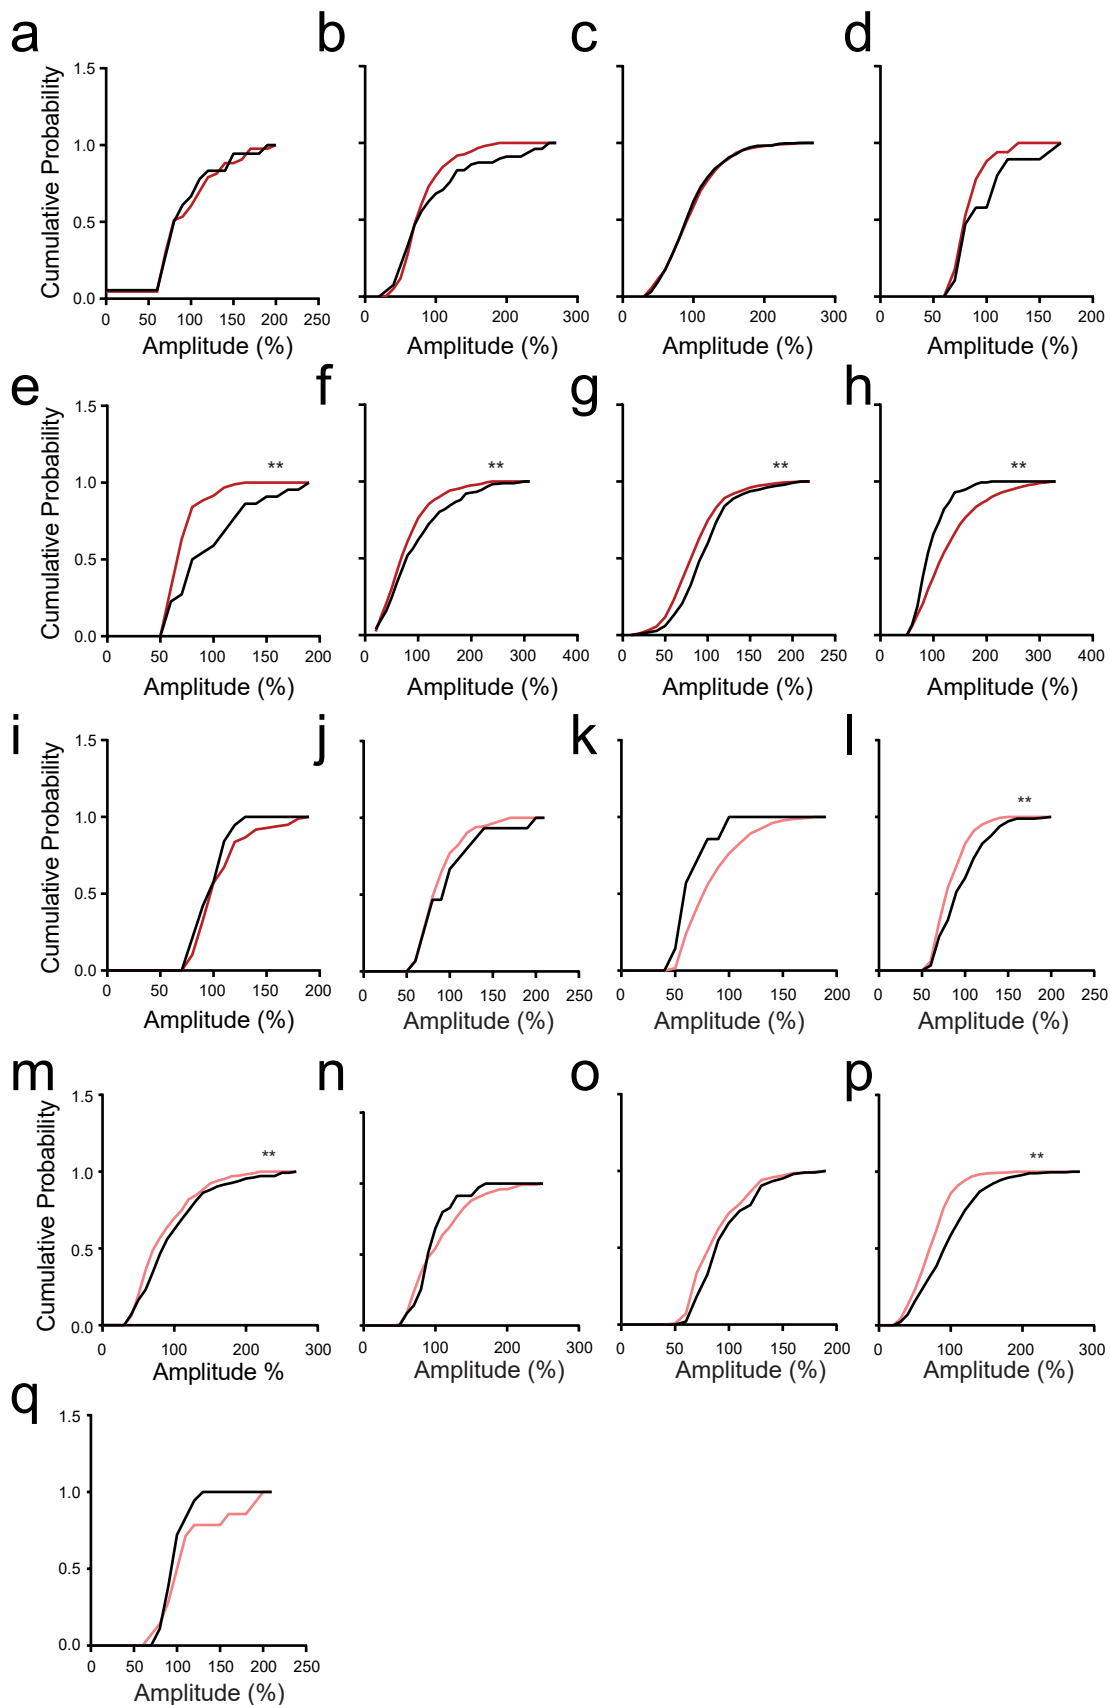

**Supplementary Figure 7. mIPSC raw amplitudes.** (a-i) Cumulative probability amplitude histograms, baseline (black) vs 10 $\mu$ M nicotine (red). Kolmogorov-Smirnov tests: D=0.1189, P=0.9939; D=0.1765, P=0.0534; D=0.05961, P=0.1772; D=0.3622, P=0.1897; D=0.4292, P=0.0028; D=0.1462, P<0.0001; D=0.1829, P<0.0001; D=0.2908, P<0.0001; D=0.2229, P=0.4079. (j-q) Cumulative probability amplitude histograms, baseline (black) vs 100nM nicotine (red). Kolmogorov-Smirnov tests: D=0.1839, p=0.7406; D=0.4232, p=0.1676; D=0.2375, p=0.0001\*; D=0.1553, p=0.0002\*; D=0.1863, p=0.2988; D=0.1534, p=0.0662; D=0.2829, p<0.0001\*; D=0.2381, p=0.7634.

\*\* P<0.01 Note that although nicotine induced IPSC amplitude changes in some recordings, most were decreases. Overall the data support the idea that the nicotine-induced change in mIPSC frequency occurs via presynaptic nAChR activation.



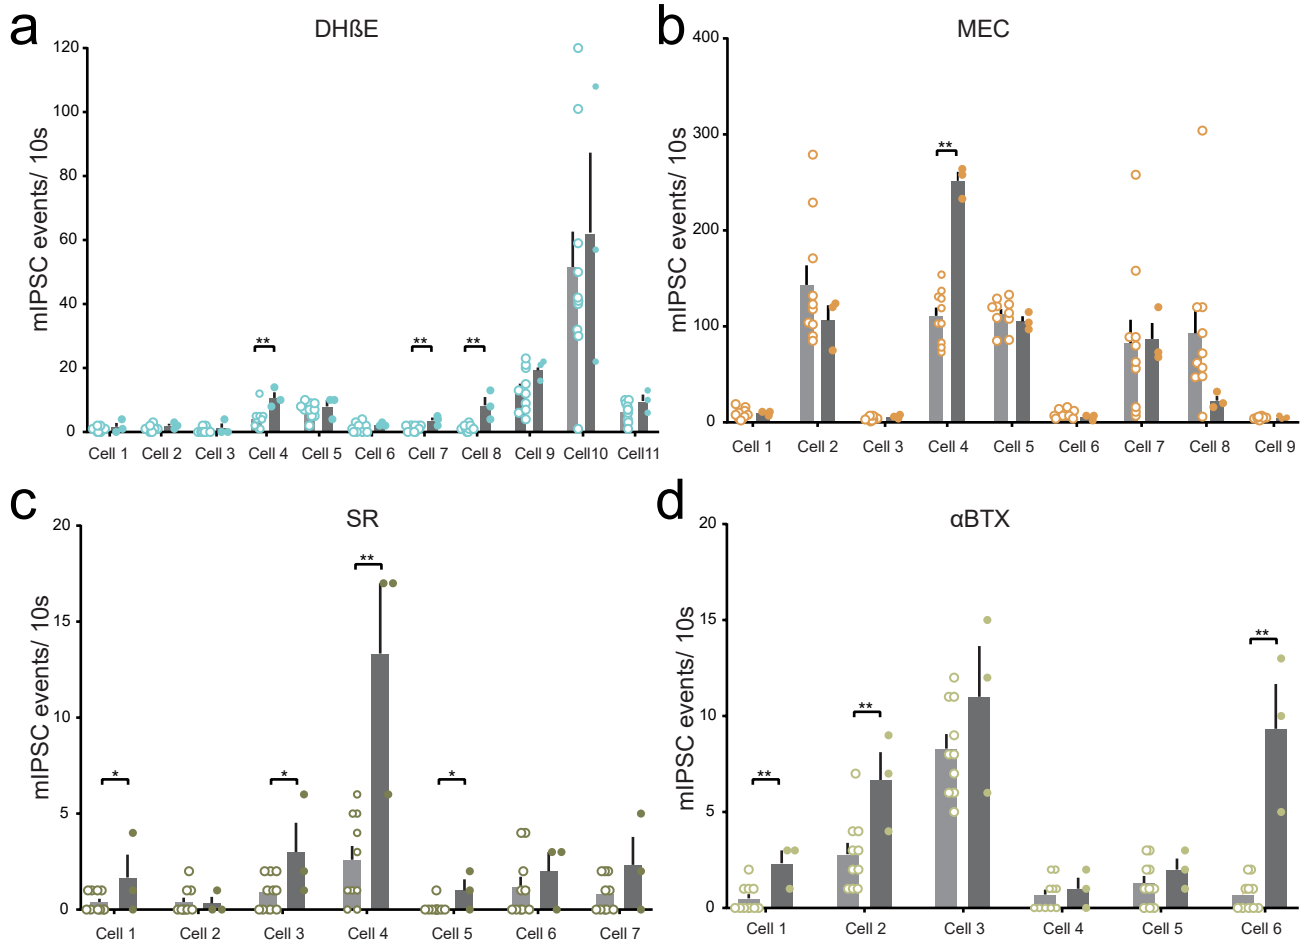

**Supplementary Figure 8. Within cell pharmacological assessment of nAChR subtype contribution to nicotine-induced enhancement of mIPSC frequency.** (a) Individual raw mIPSC frequencies (symbols) and averages (bars, +/- SEM), DHβE+baseline vs DHβE+10μM nicotine; unpaired t-tests (one-tailed):  $t_{11}=1.156$ ,  $p=0.1361$ ;  $t_{11}=1.593$ ,  $p=0.0697$ ;  $t_{13}=1.408$ ,  $p=0.0913$ ;  $t_{11}=3.104$ ,  $p=0.0050$ ;  $t_{11}=0.6404$ ,  $p=0.2675$ ;  $t_{11}=1.268$ ,  $p=0.1154$ ;  $t_{12}=4.002$ ,  $p=0.0009$ ;  $t_{11}=5.074$ ,  $p=0.0002$ ;  $t_{11}=1.638$ ,  $p=0.0649$ ;  $t_{11}=0.4465$ ,  $p=0.3319$ ;  $t_{11}=1.541$ ,  $p=0.0758$ . (b) Individual raw mIPSC frequencies (symbols) and averages (bars, +/- SEM), MEC+baseline vs MEC+10μM nicotine; unpaired t-tests (one-tailed):  $t_{11}=0.231$ ,  $P=0.4108$ ;  $t_{11}=0.947$ ,  $P=0.1820$ ;  $t_{11}=1.398$ ,  $P=0.0949$ ;  $t_{11}=8.296$ ,  $P<0.0001$ ;  $t_{11}=0.7394$ ,  $P=0.2376$ ;  $t_{11}=1.131$ ,  $P=0.1411$ ;  $t_{11}=0.09276$ ,  $P=0.4639$ ;  $t_{11}=1.438$ ,  $P=0.0891$ ;  $t_{11}=0.9392$ ,  $P=0.1839$ . (c) Individual raw mIPSC frequencies (symbols) and averages (bars, +/- SEM), SR+baseline vs SR+10μM nicotine; unpaired t-tests (one-tailed):  $t_{11}=1.918$ ,  $P=0.0407$ ;  $t_{11}=0.1492$ ,  $P=0.4420$ ;  $t_{11}=2.314$ ,  $P=0.0205$ ;  $t_{11}=4.797$ ,  $P=0.0003$ ;  $t_{11}=2.663$ ,  $P=0.0110$ ;  $t_{11}=0.7408$ ,  $P=0.2372$ ;  $t_{11}=1.716$ ,  $P=0.0571$ . (d) Individual raw mIPSC frequencies (symbols) and averages (bars, +/- SEM), αBTX+baseline vs αBTX+10μM nicotine; unpaired t-tests (one-tailed):  $t_{11}=3.45$ ,  $P=0.0027$ ;  $t_{11}=2.928$ ,  $P=0.0069$ ;  $t_{11}=1.402$ ,  $P=0.0942$ ;  $t_{11}=0.5311$ ,  $P=0.3030$ ;  $t_{11}=0.9392$ ,  $P=0.1839$ ;  $t_{11}=6.986$ ,  $P<0.0001$ . \*\* $P<0.01$ , \* $P<0.05$ .

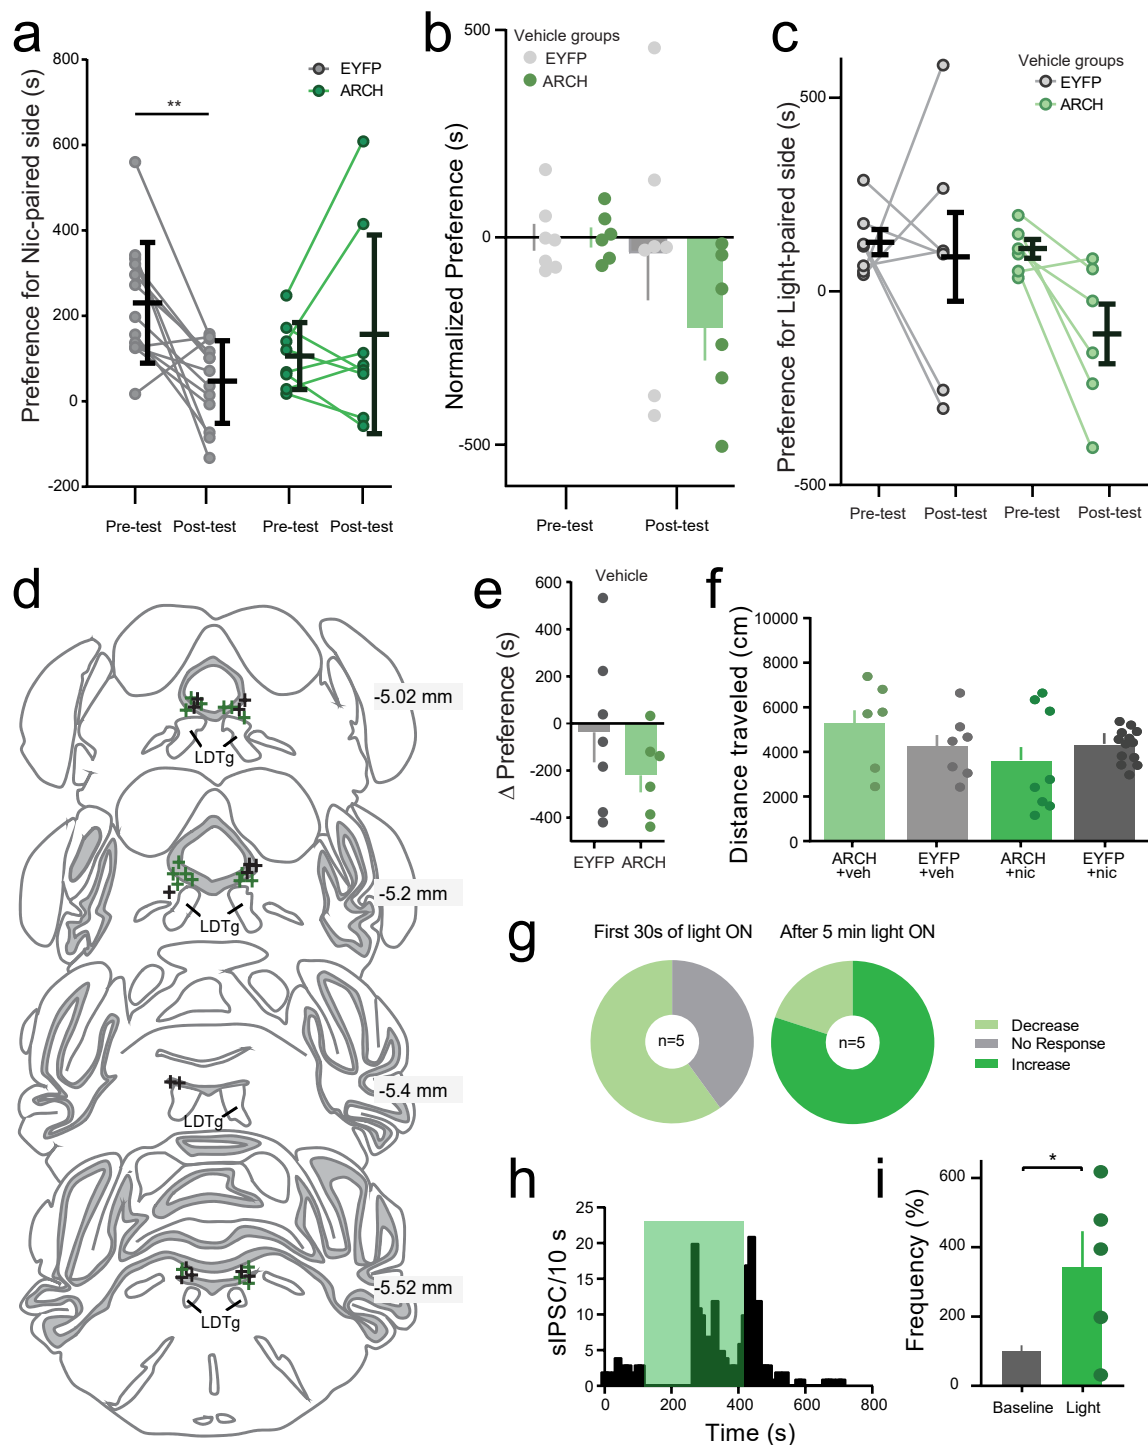

**Supplementary Figure 9. ARCH behavioral controls and physiology.** (a) Raw preference scores for nicotine-treated groups; 2-way RM ANOVA (Time:  $F_{1,19}=2.975$ ,  $P=0.1008$ ; Group:  $F_{1,19}=0.01494$ ,  $P=0.9040$ ; Interaction:  $F_{1,19}=9.109$ ,  $P=0.0071$ ); Bonferroni post-hoc (EYFP pre vs post:  $t_{19}=3.842$ ,  $P=0.0022$ ,  $n=13$ ), (ARCH pre vs post:  $t_{19}=0.8218$ ,  $P=0.8428$ ,  $n=8$ ). (b) Normalized preference scores for EYFP (gray) and ARCH (green) mice before and after 3 days of conditioning during which green light was delivered in the LDTg without being paired with nicotine; 2-way RM ANOVA (Time:  $F_{1,11}=2.812$ ,  $P=0.1217$ ; Group:  $F_{1,11}=2.254$ ,  $P=0.1614$ ; Interaction:  $F_{1,11}=1.402$ ,  $P=0.2613$ ); Bonferroni post-hoc (EYFP pre vs post:  $t_{11}=0.3625$ ,  $P>0.9999$ ,  $n=7$ ), (ARCH pre vs post:  $t_{11}=1.949$ ,  $P=0.1544$ ,  $n=6$ ). (c) Raw preference scores for vehicle control groups. (d) Fiber optic placements above the LDTg for ARCH CPA experiments. (e) Change in preference for initially preferred side after vehicle conditioning; unpaired t-test (two-tailed),  $t_{11}=1.184$ ,  $P=0.2613$ . (f) Distance traveled for all ARCH CPA conditions; one-way ANOVA,  $F_{3,30}=0.4599$ ,  $P=0.7123$ ,  $n=13$ ,  $n=8$ ,  $n=6$ ,  $n=7$  mice. (g) Pie charts showing cell sIPSC responses to light delivery at different time points. (h) Example sIPSC frequency histogram showing the time course of sIPSC changes during light exposure. (i) sIPSC frequency, baseline vs after 5 min of light; paired t-test (one-tailed),  $t_4=2.342$ ,  $P=0.0396$ ,  $n=5$  from 3 cells, 2 mice. Data are presented as mean  $\pm$  SEM. \*\* $P<0.01$ , \* $P<0.05$ .
